# Supplementary material for: A novel carbazole-benzothiazole-based chemodosimeter for the chromogenic and fluorogenic recognition of CN−
Source: Royal Society of Chemistry journal article supplement (doi:10.1039/d3nj01157g), 2023-01-01
Supplement: d3nj01157g1.pdf [file d3nj01157g1.pdf]

## Supporting Information

### **A novel carbazole-benzothiazole based chemodosimeter for chromogenic and fluorogenic recognition of CN<sup>-</sup>**

Atanu Maji, Amitav Biswas, Akash Das, Saswati Gharami, Krishnendu Aich and Tapan K. Mondal\*

*Department of Chemistry, Jadavpur University, Kolkata- 700032, India. E-mail: [tapank.mondal@jadavpuruniversity.in](mailto:tapank.mondal@jadavpuruniversity.in)*

### CONTENTS

Fig. S1. <sup>1</sup>H NMR spectrum of CBTA

Fig. S2. <sup>13</sup>C NMR spectrum of CBTA

Fig. S3. HRMS spectrum of CBTA

Fig. S4. IR spectrum of CBTA

Fig. S5. Change in UV-Vis spectra of the probe (CBTA) (20 μM) upon gradual addition of 2 equivalent of various anions (40 μM)

Fig. S6. Job's plot of CBTA for CN<sup>-</sup>

Fig. S7. Linear response curve of CBTA depending on CN<sup>-</sup> ion concentration

Fig. S8. pH study of CBTA for CN<sup>-</sup>

Fig. S9. Lifetime decay profile of CBTA and CBTA-CN<sup>-</sup>

Figure S10: Photostability study of CBTA and CBTA-CN adduct

Fig. S11. Optimized structure of CBTA calculated by DFT/B3LYP/6-31+G(d) method

Fig. S12. Optimized structure of CBTA-CN<sup>-</sup> calculated by DFT/B3LYP/6-31+G(d) method

Fig. S13. Contour plots of some selected molecular orbitals of CBTA

Fig. S14. Contour plots of some selected molecular orbitals of CBTA-CN<sup>-</sup>

Fig. S15. Color variations upon addition of different anions (40 μM) to the sensor CBTA (20 μM) under sunlight (a) and 365 nm UV light (b).

Fig. S16. <sup>1</sup>H NMR of CBTA-CN<sup>-</sup> adduct

Fig. S17. HRMS of CBTA-CN<sup>-</sup> adduct

Fig. S18. Mole ratio plot of CBTA for CN<sup>-</sup>

Fig. S19. Chemosensor performance of CBTA in buffer solution

Table S1. Vertical electronic transitions calculated by TDDFT/B3LYP/CPCM method for CBTA and CBTA-CN<sup>-</sup> in DMSO.

Table S2: Fluorescence lifetime data

Table S3. Determination of quantum yield ( $\phi$ ) of sensor CBTA at different water fraction ( $f_w$ )

Table S4. Sensor CBTA compared to others previously reported receptors

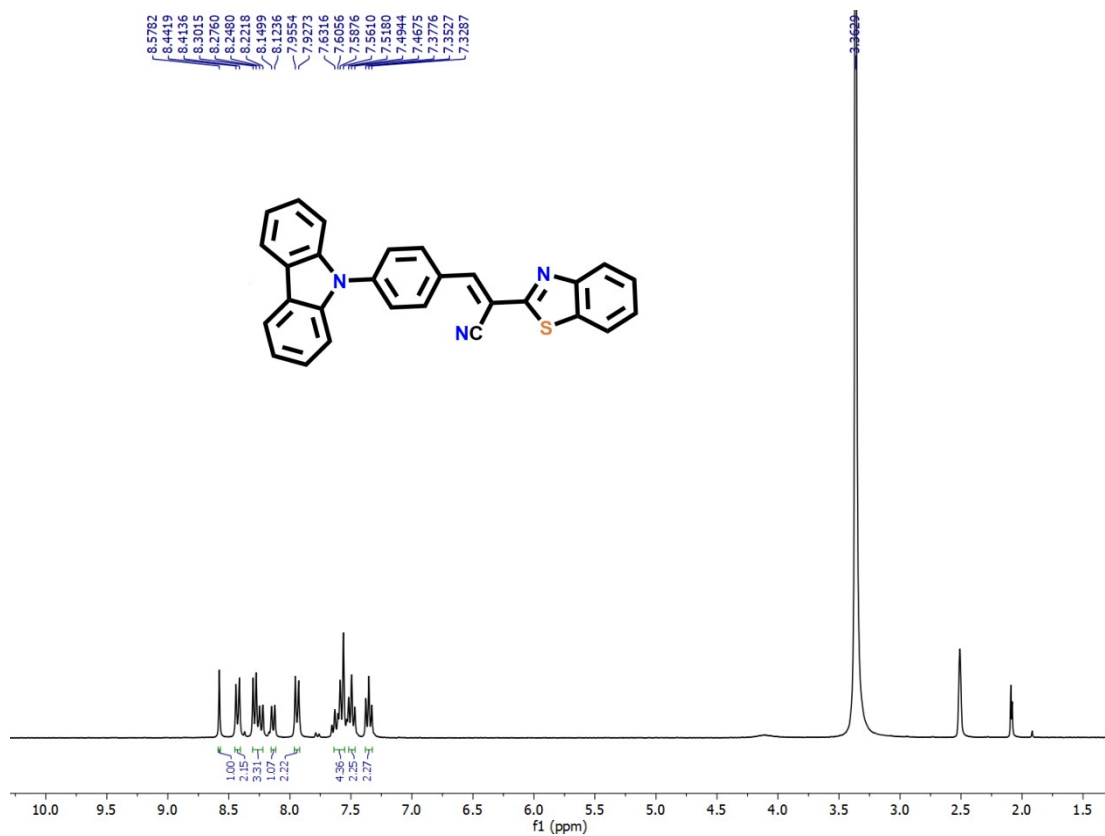

**Figure S1:** <sup>1</sup>H NMR (300 MHz) spectrum of the probe (CBTA) in DMSO-d<sub>6</sub>

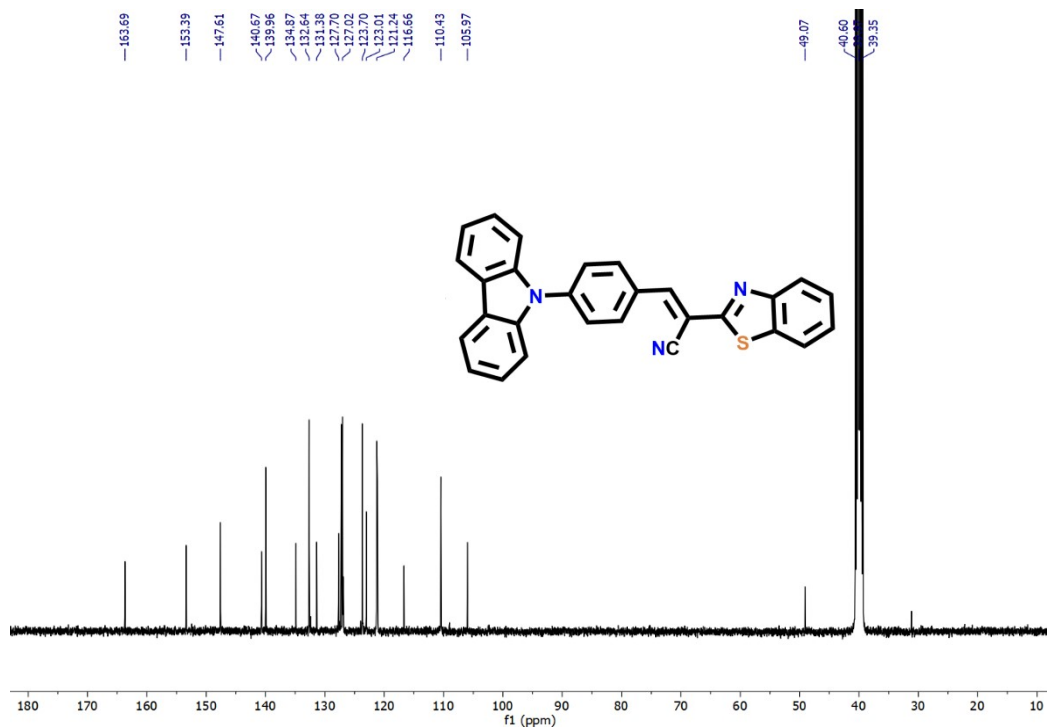

**Figure S2:** <sup>13</sup>C NMR (75 MHz) spectrum of the receptor (CBTA) in DMSO-d<sub>6</sub>

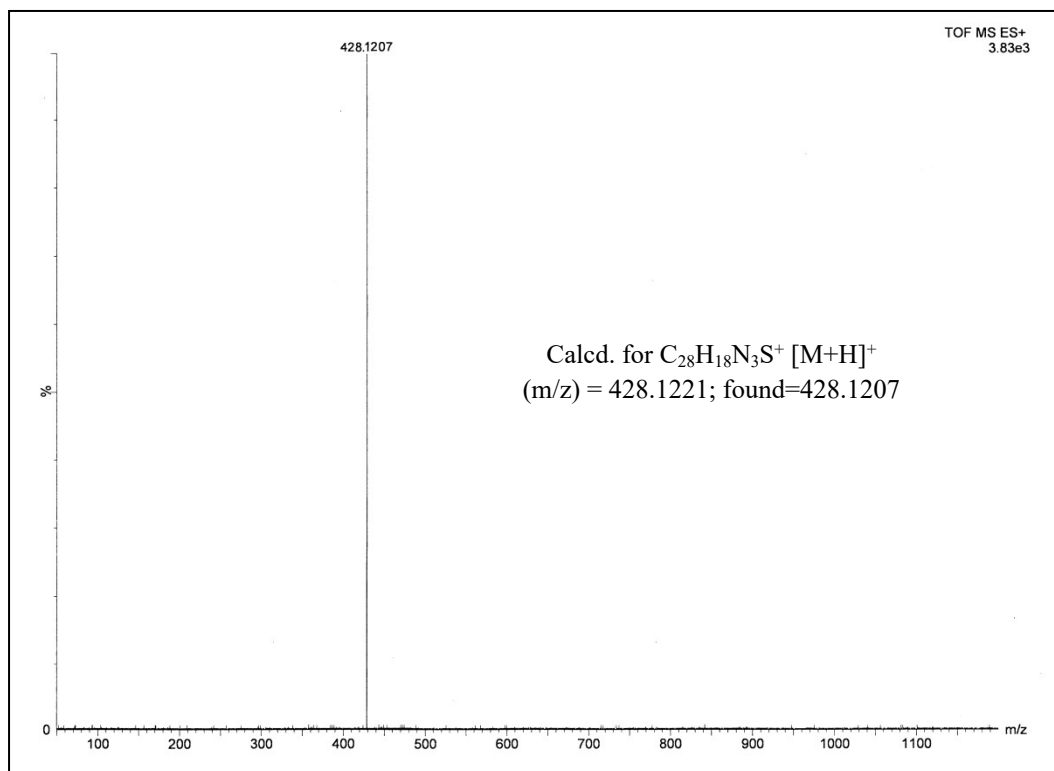

**Figure S3:** HRMS of the receptor (CBTA)

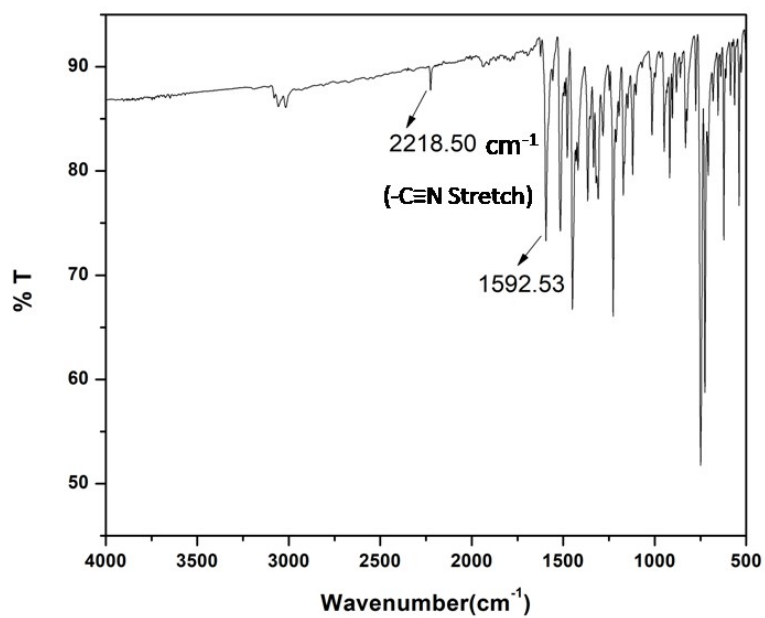

**Figure S4:** IR Spectrum of CBTA

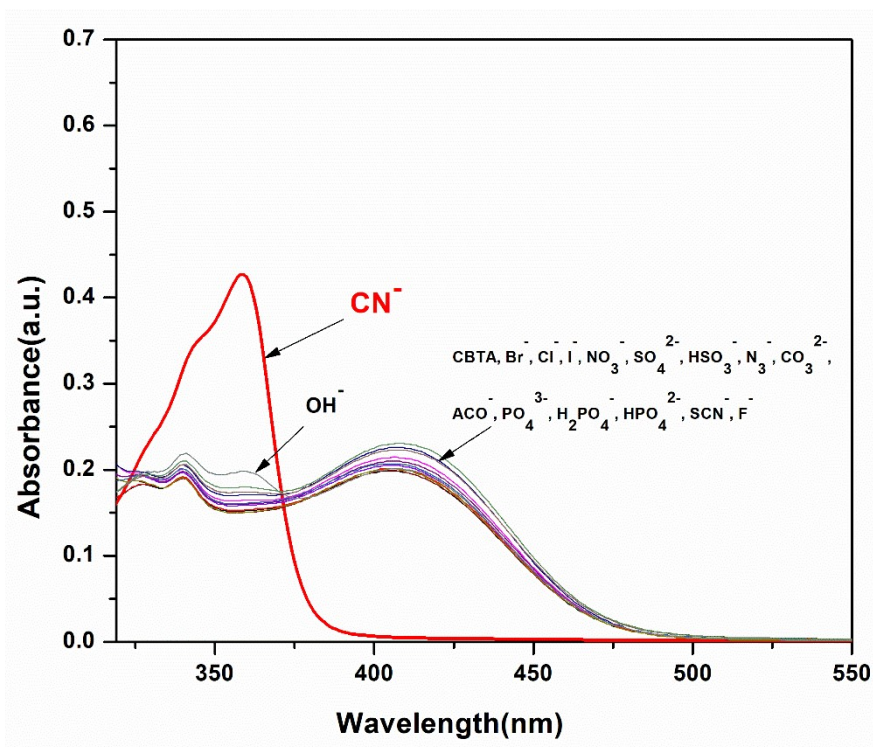

**Figure S5:** UV-Vis change of CBTA (10  $\mu\text{M}$ ) upon addition of different anions, i.e.  $\text{Br}^-$ ,  $\text{Cl}^-$ ,  $\text{I}^-$ ,  $\text{NO}_3^-$ ,  $\text{SO}_4^{2-}$ ,  $\text{SCN}^-$ ,  $\text{CO}_3^{2-}$ ,  $\text{N}_3^-$ ,  $\text{OH}^-$ ,  $\text{HCO}_3^-$ ,  $\text{H}_2\text{PO}_4^-$ ,  $\text{HPO}_4^{2-}$ ,  $\text{F}^-$ ,  $\text{ACO}^-$ ,  $\text{PO}_4^{3-}$  and  $\text{CN}^-$  (40  $\mu\text{M}$ ) in DMSO/ $\text{H}_2\text{O}$  (40:60, v:v) using HEPES buffered solution at pH=7.2.

### Job's Plot

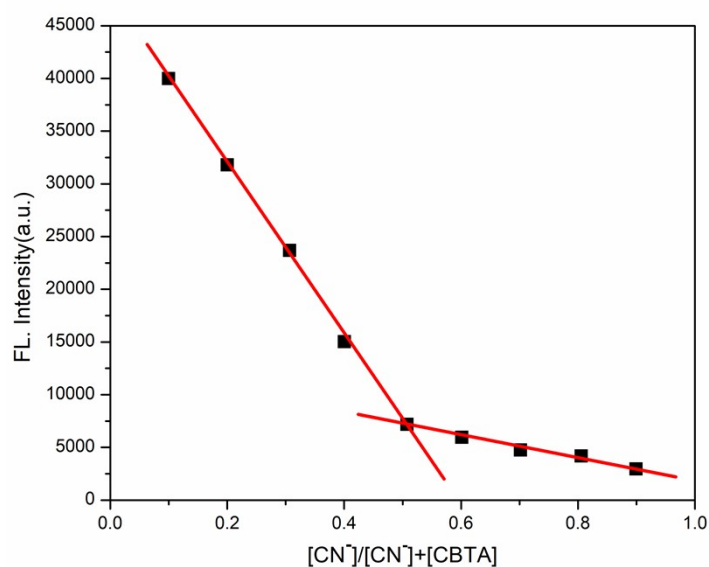

**Figure S6:** Job's plot of CBTA for  $\text{CN}^-$

### Determination of detection limit:

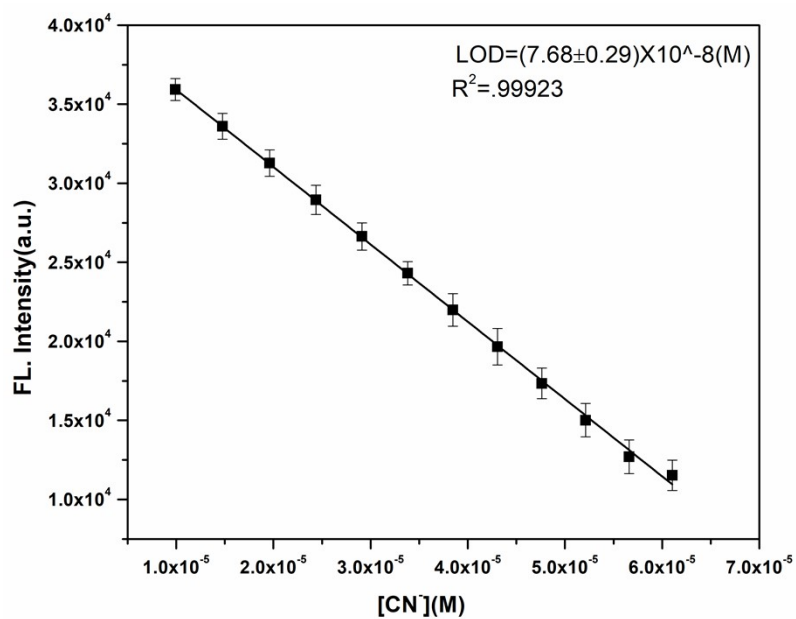

Figure S7: Linear response curve of CBTA at 616 nm depending on the CN<sup>-</sup> concentration.

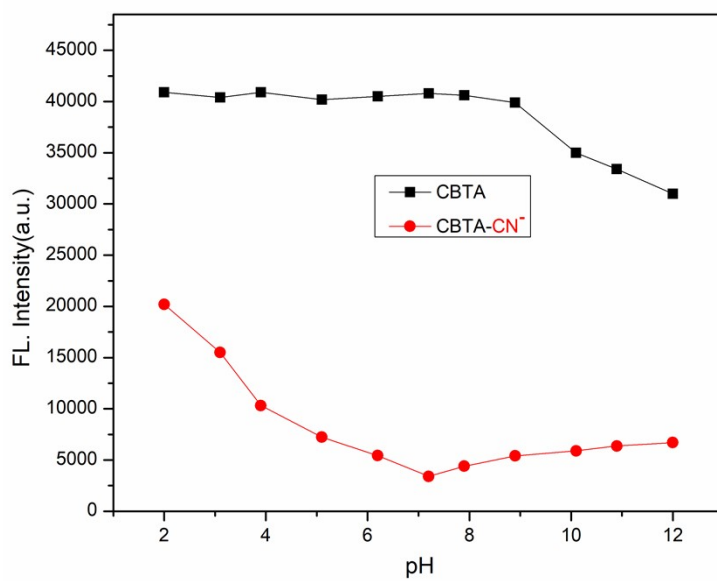

Figure S8: pH study of CBTA for CN<sup>-</sup>

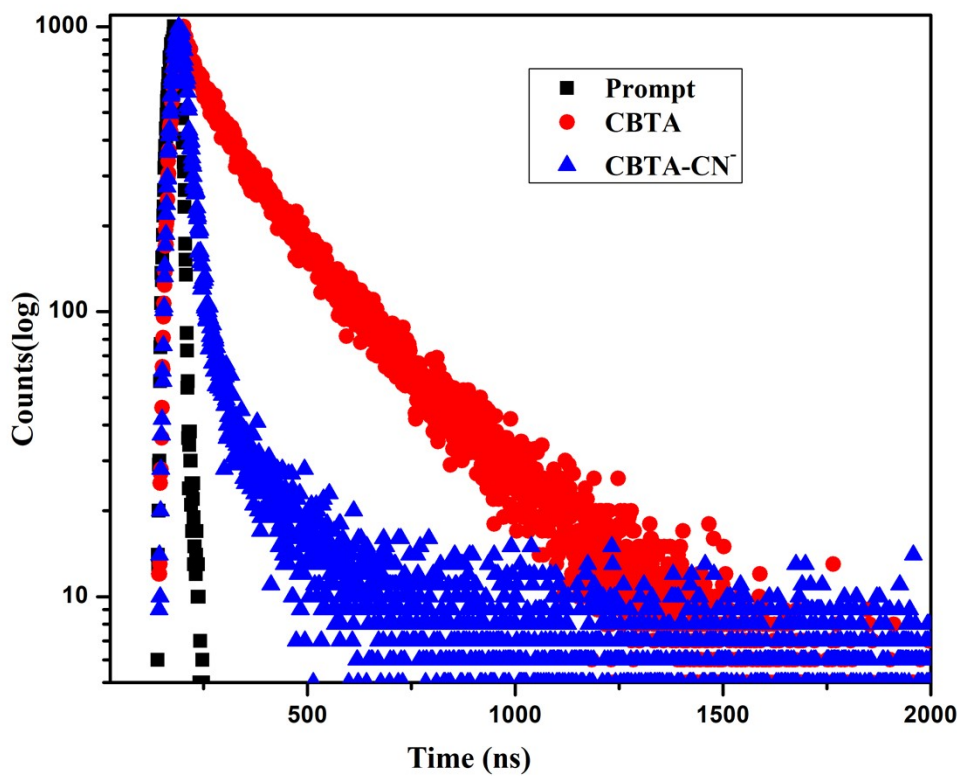

Figure S9: Lifetime decay profile of CBTA and CBTA-CN<sup>-</sup> adduct.

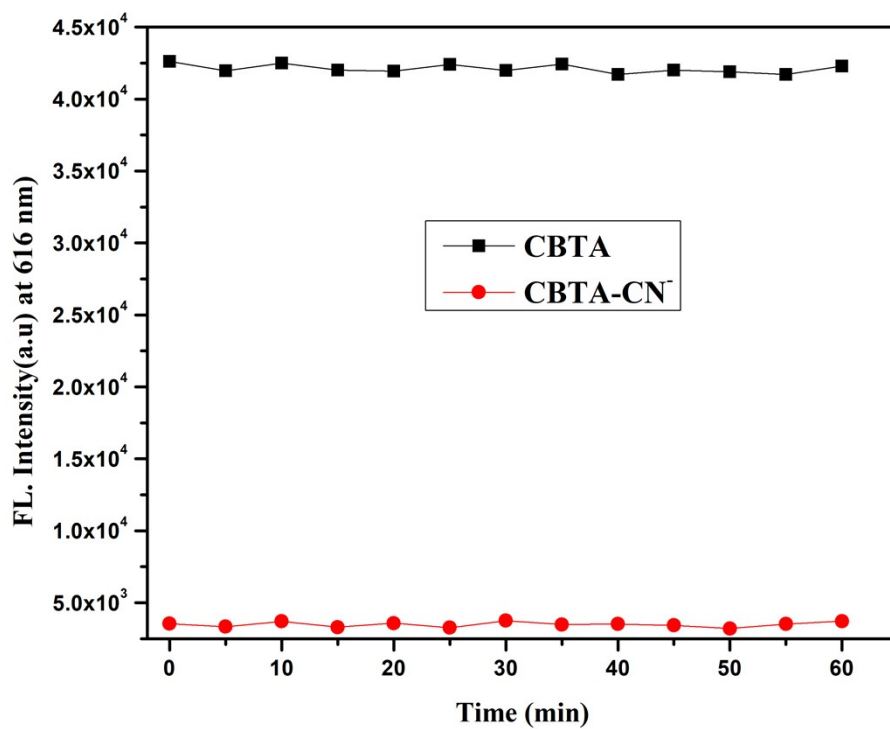

Figure S10: Photostability study of CBTA and CBTA-CN<sup>-</sup> adduct.

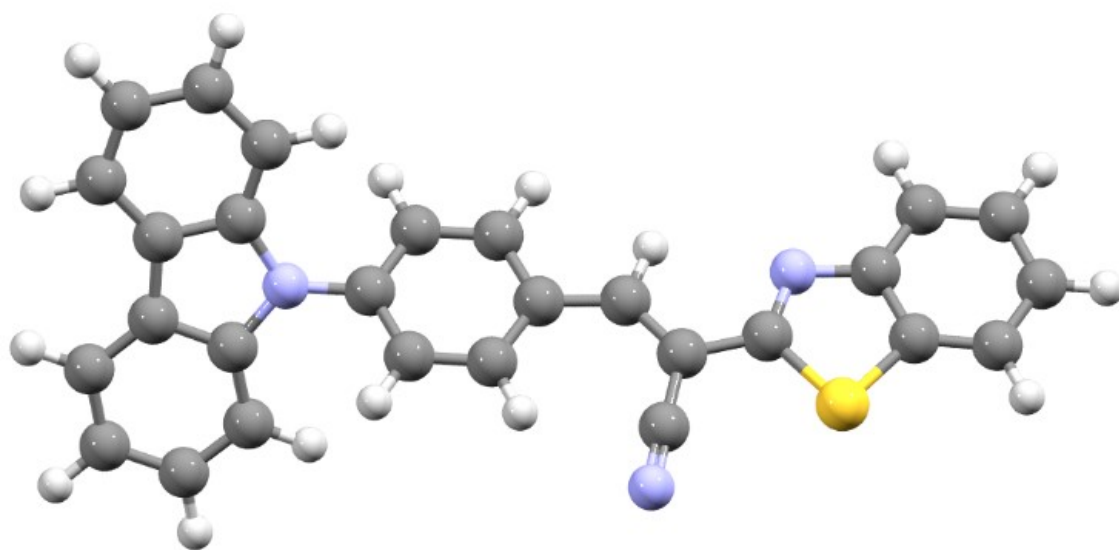

**Figure S11.** Optimized structure of CBTA calculated by DFT/B3LYP/6-31+G(d) method.

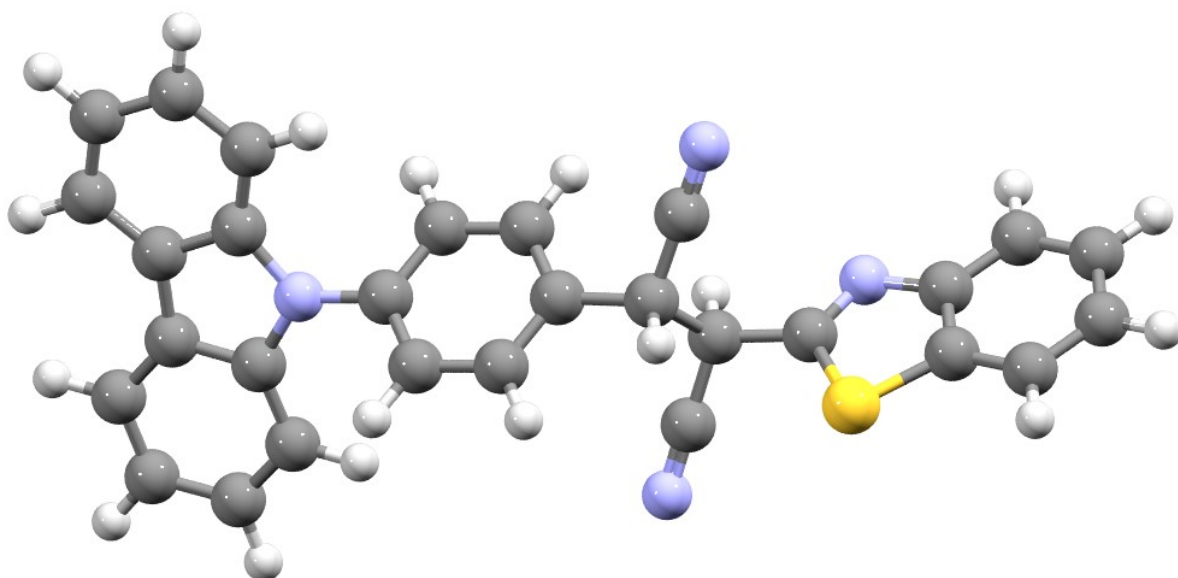

**Figure S12.** Optimized structure of CBTA-CN<sup>-</sup> calculated by DFT/B3LYP/6-31+G(d) method.



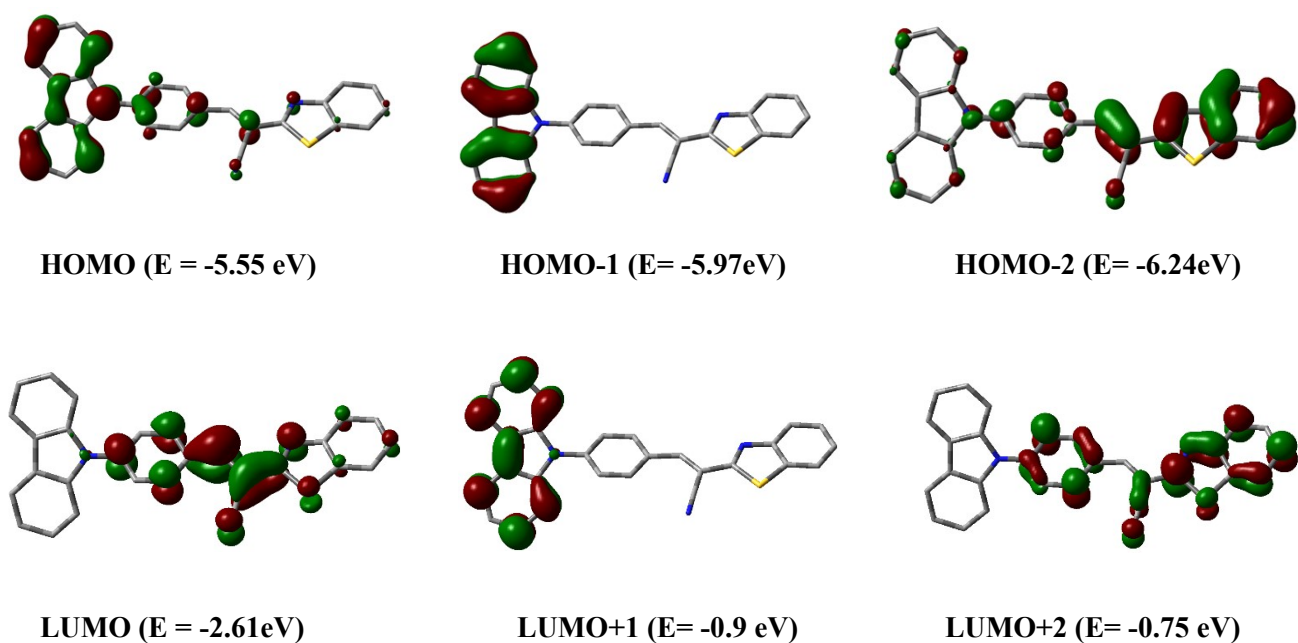

**Figure S13.** Contour plots of some selected molecular orbitals of CBTA.

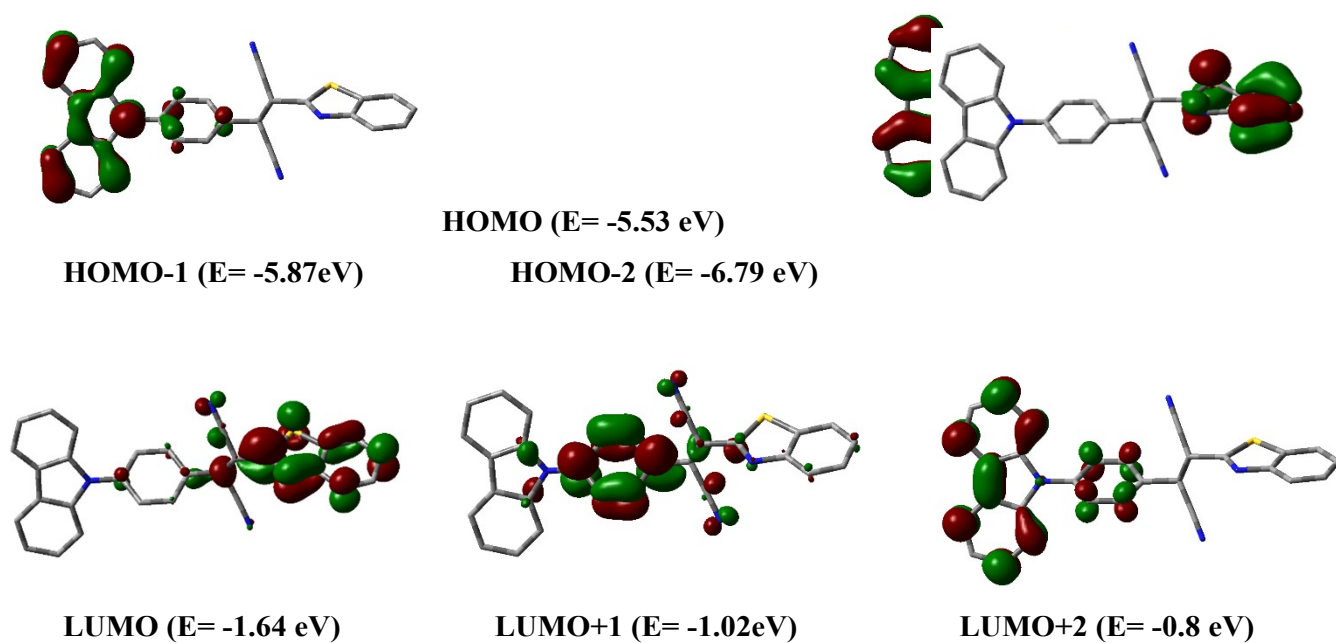

**Figure S14.** Contour plots of some selected molecular orbitals of CBTA-CN<sup>-</sup>

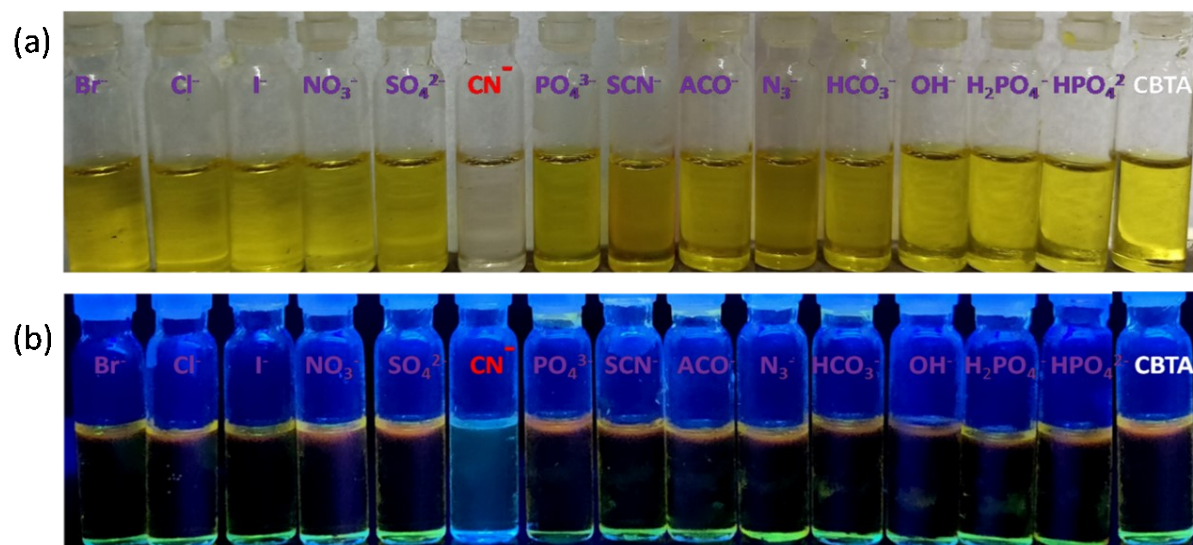

**Figure S15:** Color variations upon addition of different anions (40μM) to the sensor CBTA (20 μM) under sunlight(a) and under UV light(b).

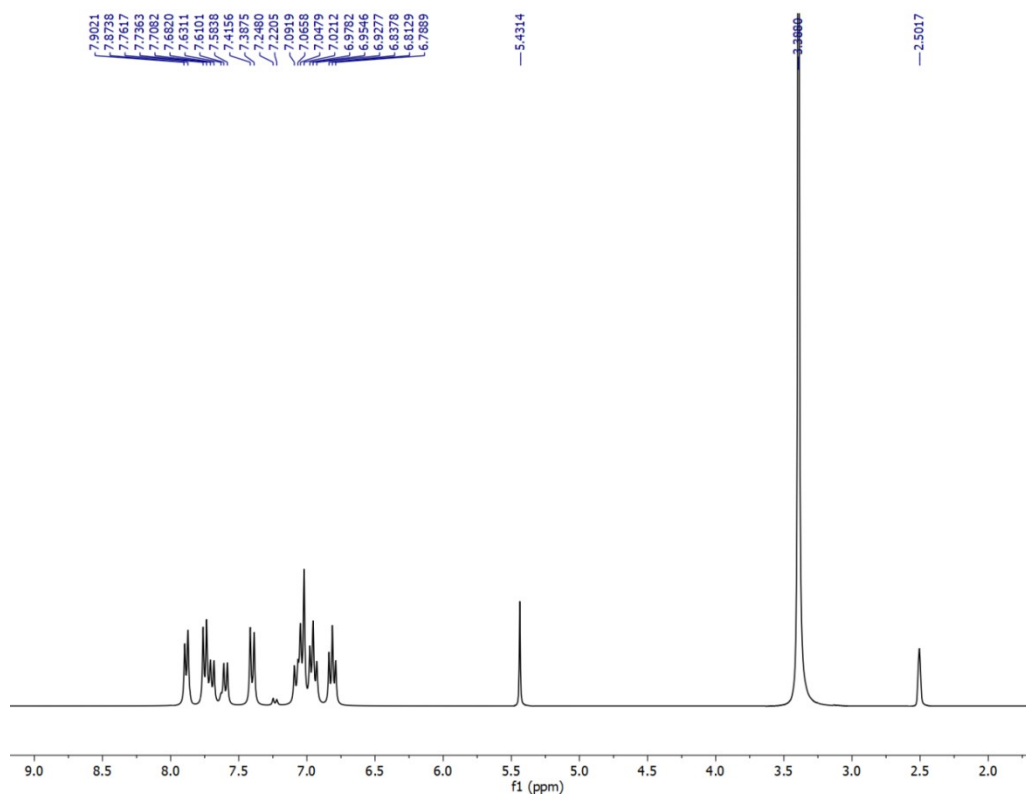

**Figure S16:** <sup>1</sup>H NMR (300 MHz) spectra of the CBTA-CN<sup>-</sup> adduct in DMSO-d<sub>6</sub>.

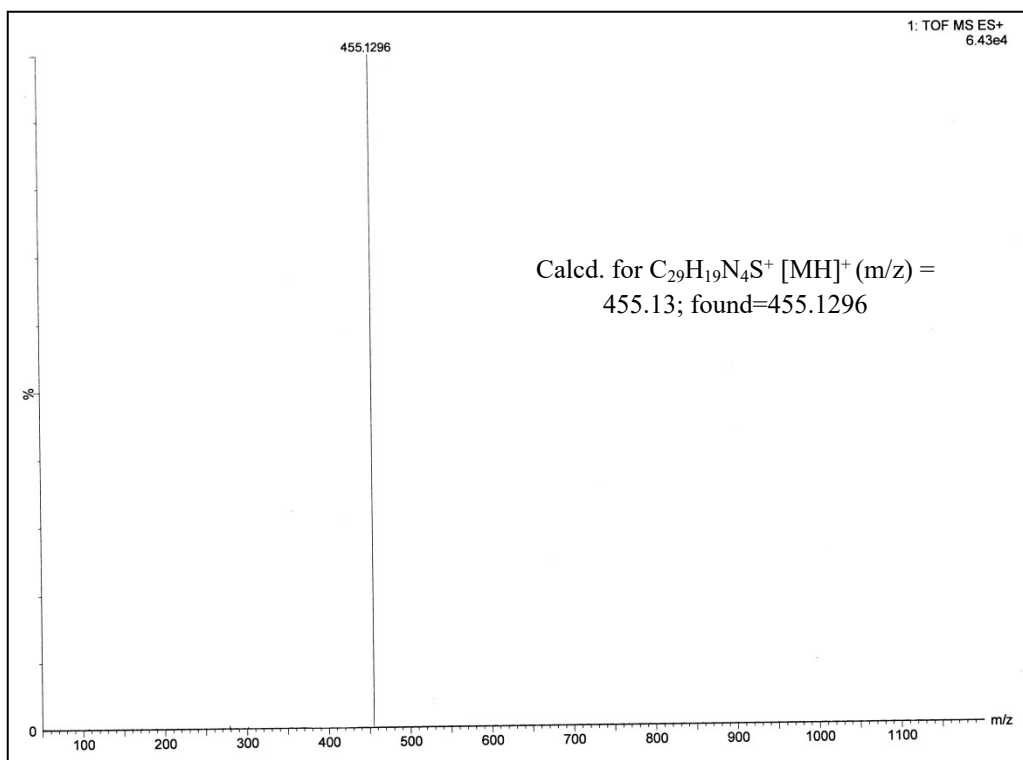

**Figure S17:** HRMS of the CBTA-CN<sup>-</sup> adduct.

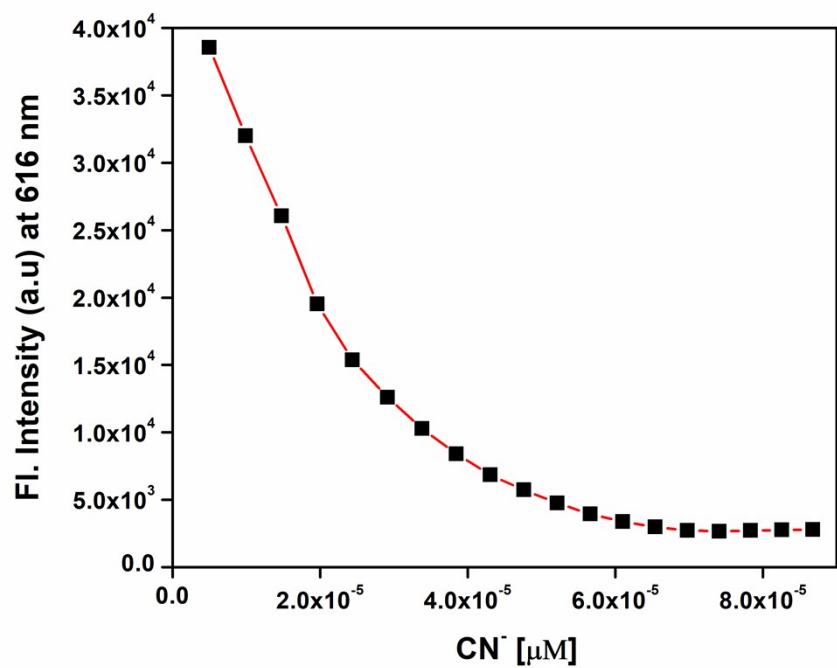

**Fig. S18:** Mole ratio plot of CBTA for CN<sup>-</sup>

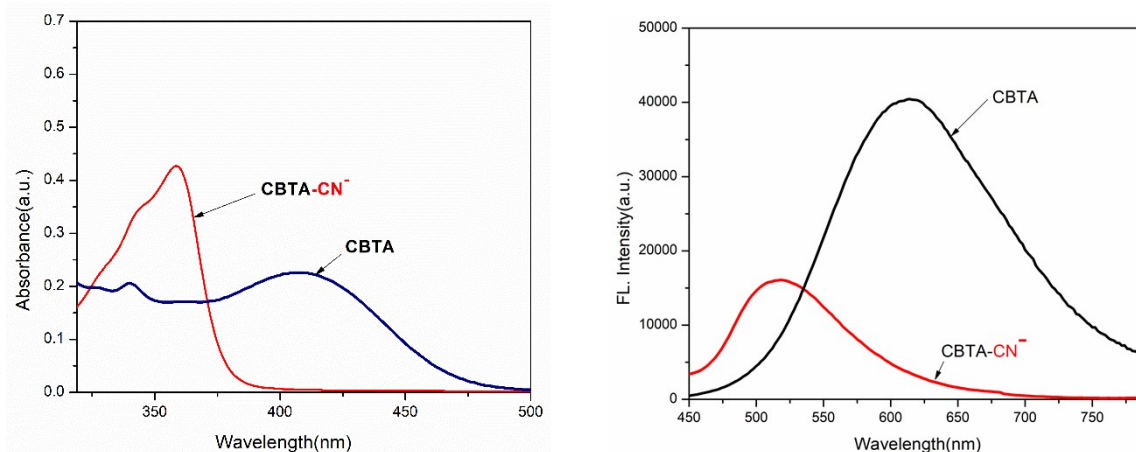

**Fig. S19:** Chemosensor performance of CBTA in buffer solution

**TableS1.** Vertical electronic transitions of CBTA and CBTA-CN<sup>-</sup> calculated by TDDFT/CPCM method

| Compd.                     | $\lambda$ (nm) | E (eV) | Osc. Strength (f) | Key excitations                                                   |
|----------------------------|----------------|--------|-------------------|-------------------------------------------------------------------|
| <b>CBTA</b>                | 491.45         | 2.5228 | 0.7330            | (99%)HOMO→LUMO                                                    |
|                            | 377.35         | 3.2857 | 0.5544            | (97%)HOMO-2→LUMO                                                  |
|                            | 293.33         | 4.2268 | 0.2105            | (85%)HOMO-6→LUMO                                                  |
|                            | 359.31         | 3.4506 | 0.0842            | (97%)HOMO-3→LUMO                                                  |
|                            | 272.04         | 4.5576 | 0.1642            | (72%)HOMO-1→LUMO+1                                                |
|                            | 242.34         | 5.1161 | 0.6343            | (62%)HOMO→LUMO+6                                                  |
|                            | 231.79         | 5.3491 | 0.1404            | (41%)HOMO-4→LUMO+1<br>(35%)HOMO-1→ LUMO+7                         |
| <b>CBTA-CN<sup>-</sup></b> | 340.06         | 3.6459 | 0.1186            | (95%)HOMO → LUMO                                                  |
|                            | 308.11         | 4.0241 | 0.1946            | (51%)HOMO → LUMO+2<br>(41%) HOMO→LUMO+1                           |
|                            | 260.43         | 4.7608 | 0.4729            | (84%)HOMO-3 → LUMO                                                |
|                            | 243.46         | 5.0926 | 0.1665            | (63%)HOMO-4 → LUMO                                                |
|                            | 240.62         | 5.1528 | 0.4896            | (27%)HOMO-4 → LUMO<br>(46%)HOMO → LUMO-7                          |
|                            | 214.97         | 5.7675 | 0.1842            | (26%)HOMO-5→ LUMO+1<br>(19%)HOMO-3 → LUMO+3<br>(25%)HOMO→ LUMO+10 |

**Determination of fluorescence Quantum Yields ( $\Phi$ ) of CBTA and its complex with CN<sup>-</sup>**

The luminescence quantum yield was determined using coumarin-153 as reference dye. The compounds and the reference dye were excited at the similar wavelength and the emission spectra were then studied. The area of the emission spectrum was integrated and the quantum yield is determined according to the following equation:

$$\phi_S/\phi_R = [A_S/A_R] \times [(Abs)_R / (Abs)_S] \times [n_S^2/n_R^2]$$

Here,  $\phi_S$  and  $\phi_R$  are the luminescence quantum yields of the sample and reference dye, respectively.  $A_S$  and  $A_R$  are the area under the emission spectra of the sample and the reference respectively,  $(Abs)_S$  and  $(Abs)_R$  are the respective optical densities of the sample and the reference solution at the wavelength of excitation, and  $n_S$  and  $n_R$  stand for the values of refractive index for the respective solvent used for the sample and reference.

The quantum yields of CBTA and CBTA-CN are determined using the above mentioned equation and the values are found to be 0.205 and 0.015 respectively.

**Table S2:** Fluorescence lifetime data

| DMSO(Solvent)              | Quantum yield( $\phi$ ) | $\tau$ (ns) | $K_r(10^8 \times S^{-1})$ | $K_{nr}(10^8 \times S^{-1})$ |
|----------------------------|-------------------------|-------------|---------------------------|------------------------------|
| <b>CBTA</b>                | 0.205                   | 6.1         | 0.336                     | 1.303                        |
| <b>CBTA-CN<sup>-</sup></b> | 0.015                   | 1.38        | 0.1086                    | 7.137                        |

**Table S3:** Determination of quantum yield ( $\phi$ ) of sensor CBTA at different water fraction ( $f_w$ )

| Sensor      | DMSO:H <sub>2</sub> O (v/v) | Water fraction(f <sub>w</sub> ) | Quantum Yields( $\phi$ ) |
|-------------|-----------------------------|---------------------------------|--------------------------|
| <b>CBTA</b> | 100:0                       | 0%                              | 0.07                     |
|             | 60:40                       | 40%                             | 0.081                    |
|             | 50:50                       | 50%                             | 0.146                    |
|             | 40:60                       | 60%                             | 0.205                    |
|             | 30:70                       | 70%                             | 0.184                    |
|             | 20:80                       | 80%                             | 0.131                    |
|             | 10:90                       | 90%                             | 0.082                    |

**Table S4:** Sensor CBTA towards CN<sup>-</sup> compared to others previously reported receptors

| Probe                                                                               | Solvent System                 | Detection limit           | Reaction time | Reference |
|-------------------------------------------------------------------------------------|--------------------------------|---------------------------|---------------|-----------|
| 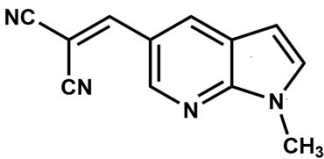 | THF/H <sub>2</sub> O(9:1)      | 2×10 <sup>-6</sup> M      |               | [1]       |
|  | DMF                            | 0.07 μM                   |               | [2]       |
|  | DMSO/H <sub>2</sub> O<br>(7:3) | 1.4×10 <sup>-7</sup><br>M |               | [3]       |
|  | CH <sub>3</sub> CN             | 0.328μM                   |               | [4]       |

|                                                                                     |                                    |                            |           |      |
|-------------------------------------------------------------------------------------|------------------------------------|----------------------------|-----------|------|
| 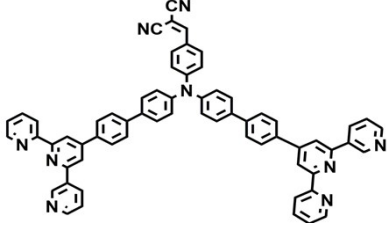   | H <sub>2</sub> O/THF(9:1)          | 3.83×10 <sup>-6</sup><br>M |           | [5]  |
|    | H <sub>2</sub> O/THF(8:2)          | 1.3×10 <sup>-7</sup><br>M  |           | [6]  |
|    | THF                                | 0.034<br>μM                |           | [7]  |
|   | DMSO/H <sub>2</sub> O<br>(1:99)    | 2.95×10 <sup>-8</sup><br>M |           | [8]  |
|  | H <sub>2</sub> O-DMF<br>(9:1,v/v)  | 1.15-1.2<br>nM             | 10-30 sec | [9]  |
|  | DMSO                               | 0.94 μM                    |           | [10] |
|  | DMSO-H <sub>2</sub> O<br>(4/1,v/v) | 3.75 nM                    | 9-10 min  | [11] |

|                                                                                   |                                      |                         |        |           |
|-----------------------------------------------------------------------------------|--------------------------------------|-------------------------|--------|-----------|
| 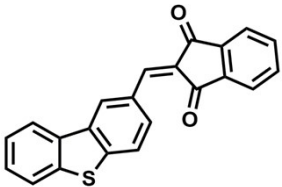 | DMSO/H <sub>2</sub> O<br>(1:99,v/v)  | $2.26 \times 10^{-7}$ M | 15 sec | [12]      |
|  | DMSO/H <sub>2</sub> O<br>(40:60,v/v) | $7.68 \times 10^{-8}$ M | 22 sec | This work |

## References

1. K. Y. Chen and W. C. Lin, *Dyes Pigm.*, 2015, **123**, 1-7.
2. K. W. Kulig, Cyanide Toxicity, U.S. Department of Health and Human Services, Atlanta GA, 1991.
3. S. Malkondu, S. Erdemirand, S. Karakurt, *Dyes Pigm.*, 2020, **174**, 108019.
4. L. Yuan, W. Lin, Y. Yang, J. Song and J. Wang, *Org. Lett.*, 2011, **13**, 3730-3733.
5. Y. Li, Z. Gu, T. He, X. Yuan, Y. Zhang, Z. Xu, H. Qiu, Q. Zhang and S. Yin, *Dyes Pigm.*, 2020, **173**, 107969.
6. B. Zhai, Z. Hu, C. Peng, B. Liu, W. Li and C. Gao, *Spectrochim. Acta A.*, 2020, **224**, 117409.
7. T. S. Reddy, H. Moon and M. S. Choi, *Spectrochim Acta A.*, 2021, **252**, 119535.
8. B. Zuo, L. Liu, X. Feng, D. Li, W. Li, M. Li, M. Huang and Q. Deng, *Dyes Pigm.*, 2021, **193**, 109534
9. N. Maurya and A. K. Singh, *Sens. and Actuat. B Chem.*, 2017, **245**, 74–80.
10. J. Chao, Z. Li, Y. Zhang, F. Huo, C. Yin, Y. Liu, Y. Li and J. Wang, *J. Mater. Chem.B.*, 2016, **4**, 3703-3712.
11. L. Patra, K. Aich, S. Gharami and T. K. Mondal, *J. Lumin.*, 2018, **201**, 419-426
12. Q. Zou, J. Du, C. Gu, D. Zhang, F. Tao and Y. Cui, *J. Photochem. Photobiol. A. Chem.*, 2021, **405**, 112993
